# Supplementary material
Source: PubMed Central journal article supplement (PMC2701696)
Supplement: NIHMS49877-supplement-01.pdf [file NIHMS49877-supplement-01.pdf]

## **Supplementary Material**

Anatomy of the E2 ligase fold: implications for enzymology and evolution of ubiquitin/Ub-like protein conjugation

National Center for Biotechnology Information, National Library of Medicine, National Institutes of Health, Bethesda, MD 20894, USA

### Table of contents

- I. E2-like domain family multiple alignments
- II. List of gene identifiers, ordered by E2-like domain family
- III. Phyletic distribution of E2 domains across eukaryotes with completely sequenced genomes
- IV. Comparison of E2 flap architectures with and without Ub/Ubl. (Adapted from pdbids: 1u9a and 1z5s).

## Figure Legends

### **IV. Comparison of E2 flap architectures with and without Ub/Ubl. Adapted from pdbids: 1u9a and 1z5s).**

The right depiction is a complex between the E2-like Ubc9 domain, the Rangap1 substrate that is conjugated to the Ubl at a conserved lysine residue, and the Ubl SUMO while the left depicts only the E2-like Ubc9. Strands are depicted as arrows, helices as coils. The E2-like domains are colored green, with the extended regions of the flap colored gray. Conserved residues surrounding the active site are rendered as ball-and-sticks. In the right depiction, the lysine-containing loop of Rangap1 is colored pink, and the Ubl SUMO tail is colored blue.

Alignment of E2 domain families displaying significant structure and/or sequence divergence surrounding the active site. Sequences are aligned based on the structure of the E2 domain from the Schistosoma mansoni protein. Residues from the above secondary structure prediction program are given at the top of the alignment, and residue categories are given at various intervals below the alignment. Residues in grey boxes are conserved in all sequences. Residues in white boxes are conserved in at least one sequence.

Table of Contents

- 1. ACTP2
2. Tsp01 (EUB)
3. Tsp01 (EUB)
4. Aps10
5. Aps1
6. Dc1
7. Dc1
8. D3EKW
9. D3EKW
10. D3EKW

1. ACTP2

FINAL
12443462 Paramonix tetraurelia
5828487 Cryptosporidium parvum var. parvum...\_EJC1
12443462 Paramonix tetraurelia
5828487 Cryptosporidium parvum var. parvum...\_EJC1
12443462 Paramonix tetraurelia
5828487 Cryptosporidium parvum var. parvum...\_EJC1

2. Tsp01 (EUB)

FINAL
5247446 Mus musculus
6350454 Thelazia annulata
7103227 Thelazia parva strain NUG8
6746729 Euzooboa hiolayana NB 1108
6746729 Euzooboa hiolayana NB 1108
6746729 Euzooboa hiolayana NB 1108

3. R9D

FINAL
4934344 Drosophila melanogaster
9104441 Tribolium castaneum
6469979 Tribolium castaneum
9104441 Tribolium castaneum
6469979 Tribolium castaneum
9104441 Tribolium castaneum

4. Aps10

FINAL
1313370 Schistosoma boydii

5. Aps1

FINAL
1313370 Schistosoma boydii

Main alignment table showing amino acid sequences for various species across multiple columns. Includes species names like Paramonix tetraurelia, Cryptosporidium parvum, Mus musculus, Thelazia annulata, Tribolium castaneum, and Schistosoma boydii. Sequences are aligned based on structural and sequence divergence around the active site.





List of gis, ordered by family

Each cluster of gi numbers represents a non-classical, eukaryotic E2 ligase domain variant and is preceded by a count of total members from selected lineages. Please refer to previous work for lists of prokaryotic E2 proteins (ftp://ftp.ncbi.nih.gov/pub/aravind/UB/). Each sequence is identified by gi, gene name, protein length, species name, lineage name, and genbank protein description. Note: eukaryotic proteomes with unassigned gi numbers have been assigned temporary ids, prefixed by species abbreviations which follow:

Naegleria gruberi: Ngru  
Phytophthora sojae: Psoj  
Phytophthora ramorum: Pram  
Phaeodactylum tricornutum: Ptri  
Chlamydomonas reinhardtii: Crei  
Thalassiosira pseudonana: Tpseu  
Nematostella vectens: Nvec  
Branchiostoma floridae: Bflo

Table of Contents

1. Apg3
2. Apg10
3. Tsg101 (UEV)
4. BRUCE-like
5. UBE2W
6. Ufc1
7. Ubc6p
8. UbcI
9. AKTIP

1. Apg3

\*\*COUNTS\*\*

|                                   |    |
|-----------------------------------|----|
| parabasalia                       | 1  |
| heterolobosea                     | 1  |
| euglenozoa>kinetoplastida         | 4  |
| alveolata                         | 5  |
| alveolata>ciliophora              | 6  |
| stramenopiles                     | 4  |
| viridiplantae                     | 3  |
| entamoebidae                      | 1  |
| mycetozoa>dictyosteliida          | 2  |
| fungi>ascomycota                  | 10 |
| fungi>basidiomycota               | 2  |
| metazoa                           | 1  |
| metazoa>Choanoflagellida          | 1  |
| metazoa>Chordata                  | 4  |
| metazoa>Cnidaria                  | 1  |
| metazoa>echinodermata             | 1  |
| metazoa>hexapoda                  | 4  |
| metazoa>vertebrata                | 5  |
| metazoa>vertebrata>actinopterygii | 4  |

|                 |                        |      |                                               |                                   |                                                                     |
|-----------------|------------------------|------|-----------------------------------------------|-----------------------------------|---------------------------------------------------------------------|
| 65303096        | TA03605                | 203  | Theileria annulata                            | alveolata                         | hypothetical protein, conserved [Theileria annulata].               |
| X#46_m01688     | X#46_m01688            | 389  | Toxoplasma gondii                             | alveolata                         | autophagocytosis associated protein, putative                       |
| 66359970        | cg8 2630               | 242  | Cryptosporidium parvum Iowa II                | alveolata                         | APG10/ Aut1p like like autophagocytosis protein involved in         |
| 71027271        | TP03_0261              | 197  | Theileria parva strain Muguga                 | alveolata                         | hypothetical protein TP03_0261 [Theileria parva strain Muguga].     |
| 23613578        | PF0280c                | 298  | Plasmodium falciparum 3D7                     | alveolata                         | hypothetical protein [Plasmodium falciparum 3D7].                   |
| 124396640       | GSPATT00032381001      | 229  | Paramecium tetraurelia                        | alveolata>ciliophora              | unnamed protein product [Paramecium tetraurelia].                   |
| 89292028        | THERM_01050620         | 280  | Tetrahymena thermophila SB210                 | alveolata>ciliophora              | Autophagocytosis associated protein, C-terminal domain containing   |
| 124405511       | GSPATT00000653001      | 240  | Paramecium tetraurelia                        | alveolata>ciliophora              | unnamed protein product [Paramecium tetraurelia].                   |
| 124430297       | GSPATT00027413001      | 108  | Paramecium tetraurelia                        | alveolata>ciliophora              | unnamed protein product [Paramecium tetraurelia].                   |
| 124419471       | GSPATT00018613001      | 241  | Paramecium tetraurelia                        | alveolata>ciliophora              | unnamed protein product [Paramecium tetraurelia].                   |
| 8290045         | THERM_00012980         | 225  | Tetrahymena thermophila SB210                 | alveolata>ciliophora              | Autophagocytosis associated protein, C-terminal domain containing   |
| 56471771        | 46_t00033              | 268  | Entamoeba histolytica HM-1,IMSS               | entamoebidae                      | autophagocytosis protein, putative [Entamoeba histolytica           |
| 71421296        | Tc00_1047053510257.90  | 270  | Trypanosoma cruzi strain CL Brener            | euglenozoa>kinetoplastida         | autophagocytosis associated protein [Trypanosoma cruzi strain CL    |
| 68128829        | LmjF33_0295            | 275  | Leishmania major                              | euglenozoa>kinetoplastida         | autophagocytosis protein, putative [Leishmania major].              |
| 84043456        | Tb927.2.1890           | 292  | Trypanosoma brucei TREU927                    | euglenozoa>kinetoplastida         | autophagocytosis associated protein [Trypanosoma brucei TREU927].   |
| 71649849        | Tc00_1047053509213.130 | 270  | Trypanosoma cruzi strain CL Brener            | euglenozoa>kinetoplastida         | autophagocytosis associated protein [Trypanosoma cruzi strain CL    |
| 50420719        | DEHA0D10846g           | 324  | Debaryomyces hansenii CBS767                  | fungi>ascomycota                  | hypothetical protein DEHA0D10846g [Debaryomyces hansenii CBS767].   |
| 50310697        | KLLA0F06402g           | 302  | Kluyveromyces lactis NRRL Y-1140              | fungi>ascomycota                  | unnamed protein product [Kluyveromyces lactis].                     |
| 50290141        | CAGL0I05808g           | 309  | Candida glabrata CBS 138                      | fungi>ascomycota                  | hypothetical protein CAGL0I05808g [Candida glabrata CBS138].        |
| 6324334         | ATG3                   | 310  | Saccharomyces cerevisiae                      | fungi>ascomycota                  | Atg3p [Saccharomyces cerevisiae].                                   |
| 42548126        | FG08900.1              | 349  | Gibberella zeae PH-1                          | fungi>ascomycota                  | hypothetical protein FG08900.1 [Gibberella zeae PH-1].              |
| 85120165        | NCU01955.1             | 352  | Neurospora crassa OR74A                       | fungi>ascomycota                  | hypothetical protein [Neurospora crassa OR74A].                     |
| 70998182        | AFUA_5G08170           | 353  | Aspergillus fumigatus Af293                   | fungi>ascomycota                  | autophagocytosis protein Aut1, putative [Aspergillus fumigatus      |
| 50553884        | YARL10E24453g          | 366  | Yarrowia lipolytica CLIB122                   | fungi>ascomycota                  | hypothetical protein [Yarrowia lipolytica].                         |
| 19113456        | SPBC3B9_06c            | 275  | Schizosaccharomyces pombe 972h-               | fungi>ascomycota                  | hypothetical protein SPBC3B9_06c [Schizosaccharomyces pombe 972h-]. |
| 45198343        | AGOS AFL178W           | 282  | Ashbya gossypii ATCC 10895                    | fungi>ascomycota                  | AFL178Wp [Ashbya gossypii ATCC 10895].                              |
| 58260390        | CNK00360               | 385  | Cryptococcus neoformans var. neoformans JEC21 | fungi>basidiomycota               | autophagy-related protein [Cryptococcus neoformans var. neoformans  |
| 71003271        | UM00169.1              | 439  | Ustilago maydis 521                           | fungi>basidiomycota               | hypothetical protein UM00169.1 [Ustilago maydis 521].               |
| Ngru1000009601  | Ngru1000009601         | 304  | Naegleria gruberi                             | heterolobosea                     | fgenesH pg.scaffold 40000109                                        |
| 17543646        | Y55F3AM.4              | 305  | Caenorhabditis elegans                        | metazoa                           | Y55F3AM.4 [Caenorhabditis elegans].                                 |
| Mbre1000005126  | Mbre1000005126         | 342  | Monosiga brevicollis                          | metazoa>Choanoflagellida          | fgenesH2 pg.scaffold_25000124                                       |
| ci0100131803    | ci0100131803           | 254  | Ciona intestinalis                            | metazoa>Chordata                  | ci0100131803                                                        |
| Bflo1000027008  | Bflo1000027008         | 1023 | Branchiostoma floridae                        | metazoa>Chordata                  | estExt fgenesH2 pg.C 400088                                         |
| Bflo1000029400  | Bflo1000029400         | 318  | Branchiostoma floridae                        | metazoa>Chordata                  | estExt fgenesH2 pg.C 1590012                                        |
| ci0100142936    | ci0100142936           | 312  | Ciona intestinalis                            | metazoa>Chordata                  | ci0100146633                                                        |
| Nvec1000006208  | Nvec1000006208         | 329  | Nematostella vectensis                        | metazoa>Cnidaria                  | e gw.31.166.1                                                       |
| 115956521       | LOC594526              | 268  | Strongylocentrotus purpuratus                 | metazoa>echinodermata             | PREDICTED: similar to MGC80121 protein [Strongylocentrotus          |
| 91092526        | LOC655634              | 316  | Tribolium castaneum                           | metazoa>hexapoda                  | PREDICTED: similar to CG6877-PA [Tribolium castaneum].              |
| 58379448        | Agap ENSANGG0000012603 | 331  | Anopheles gambiae str. PEST                   | metazoa>hexapoda                  | ENSANGP0000015092 [Anopheles gambiae str. PEST].                    |
| 66564768        | LOC552315              | 327  | Apis mellifera                                | metazoa>hexapoda                  | PREDICTED: similar to Aut1 CG6877-PA [Apis mellifera].              |
| 21357935        | Aut1                   | 330  | Drosophila melanogaster                       | metazoa>hexapoda                  | Aut1 CG6877-PA [Drosophila melanogaster].                           |
| 19526773        | ATG3                   | 314  | Homo sapiens                                  | metazoa>vertebrata                | Apg3p [Homo sapiens].                                               |
| 114588464       | ATG3                   | 318  | Pan troglodytes                               | metazoa>vertebrata                | PREDICTED: Apg3p isoform 2 [Pan troglodytes].                       |
| 19705511        | Apg3l                  | 314  | Rattus norvegicus                             | metazoa>vertebrata                | APG3 autophagy 3-like [Rattus norvegicus].                          |
| 114588462       | ATG3                   | 314  | Pan troglodytes                               | metazoa>vertebrata                | PREDICTED: hypothetical protein isoform 1 [Pan troglodytes].        |
| 13385890        | Atg3                   | 314  | Mus musculus                                  | metazoa>vertebrata                | autophagy Apg3p/Aut1p-like [Mus musculus].                          |
| 41053345        | apg3l                  | 317  | Danio rerio                                   | metazoa>vertebrata                | APG3 autophagy 3-like [Danio rerio].                                |
| 47226783        | GSTEN:00027065:G:001   | 133  | Tetraodon nigroviridis                        | metazoa>vertebrata>actinopterygii | unnamed protein product [Tetraodon nigroviridis].                   |
| 47226782        | GSTEN:00027064:G:001   | 135  | Tetraodon nigroviridis                        | metazoa>vertebrata>actinopterygii | unnamed protein product [Tetraodon nigroviridis].                   |
| 68355530        | LOC563944              | 66   | Danio rerio                                   | metazoa>vertebrata>actinopterygii | PREDICTED: similar to APG3 autophagy 3-like [Danio rerio].          |
| 66818030        | DBDRAFT_0217934        | 343  | Dictyostelium discoideum AX4                  | mycetozoa>dictyosteliida          | hypothetical protein DBDRAFT_0217934 [Dictyostelium discoideum      |
| 28828597        | -                      | 338  | Dictyostelium discoideum                      | mycetozoa>dictyosteliida          | hypothetical protein [Dictyostelium discoideum].                    |
| 121911929       | TVAG 447140            | 258  | Trichomonas vaginalis G3                      | parabasalia                       | autophagocytosis associated protein, putative [Trichomonas          |
| Tpseu1000007918 | Tpseu1000007918        | 315  | Thalassiosira pseudonana                      | stramenopiles                     | 145968                                                              |
| Psoj1000017156  | Psoj1000017156         | 337  | Phytophthora sojae                            | stramenopiles                     | 110627                                                              |
| Ptri1000002031  | Ptri1000002031         | 303  | Phaeodactylum tricornutum                     | stramenopiles                     | fgenesH1 pm.c_chr_1000016                                           |
| Pram1000014227  | Pram1000014227         | 323  | Phytophthora ramorum                          | stramenopiles                     | 47287                                                               |
| 18424474        | ATS661500              | 313  | Arabidopsis thaliana                          | viridiplantae                     | autophagy 3 (APG3) [Arabidopsis thaliana].                          |
| Crei1000012355  | Crei1000012355         | 307  | Chlamydomonas reinhardtii                     | viridiplantae                     | estExt fgenesH2 pg.C 50319                                          |
| 116058478       | Ot06g04060             | 81   | Ostreococcus tauri                            | viridiplantae                     | Protein involved in autophagocytosis during starvation (ISS)        |

2. Apg10

\*\*COUNTS\*\*

|                          |   |
|--------------------------|---|
| parabasalia              | 1 |
| stramenopiles            | 2 |
| viridiplantae            | 2 |
| entamoebidae             | 1 |
| mycetozoa>dictyosteliida | 1 |
| fungi>ascomycota         | 3 |
| fungi>basidiomycota      | 1 |
| metazoa                  | 1 |
| metazoa>Chordata         | 3 |
| metazoa>Cnidaria         | 1 |



## supplementary\_material\_E2\_gis.txt

|                 |                     |     |                           |               |                                                              |
|-----------------|---------------------|-----|---------------------------|---------------|--------------------------------------------------------------|
| Psoj1000006153  | Psoj1000006153      | 412 | Phytophthora sojae        | stramenopiles | 132761                                                       |
| Ptri1000008763  | Ptri1000008763      | 411 | Phaeodactylum tricornutum | stramenopiles | estExt Genewis1.C chr 140041                                 |
| Ptri1000004948  | Ptri1000004948      | 421 | Phaeodactylum tricornutum | stramenopiles | estExt fgeneshl_pg.C_chr_230106                              |
| Pram1000004476  | Pram1000004476      | 444 | Phytophthora ramorum      | stramenopiles | 79629                                                        |
| Tpseu1000001553 | Tpseu1000001553     | 400 | Thalassiosira pseudonana  | stramenopiles | 103937                                                       |
| 116056391       | OT0360280           | 438 | Ostreococcus tauri        | viridiplantae | putative human tumor susceptibility gene-like protein (ISS)  |
| 18395936        | ATELC/ELC           | 398 | Arabidopsis thaliana      | viridiplantae | ATELC/ELC; ubiquitin binding [Arabidopsis thaliana].         |
| Crei1000005374  | Crei1000005374      | 525 | Chlamydomonas reinhardtii | viridiplantae | Chlre2 kg.scaffold 16000223                                  |
| 15240732        | ATELC-LIKE/ELC-LIKE | 368 | Arabidopsis thaliana      | viridiplantae | ATELC-LIKE/ELC-LIKE [Arabidopsis thaliana].                  |
| 42569747        | AT2G38830           | 331 | Arabidopsis thaliana      | viridiplantae | tumor susceptibility protein-related [Arabidopsis thaliana]. |

## 4. BRUCE-like

|                                   |                      |      |                                               |                                   |                                                                     |
|-----------------------------------|----------------------|------|-----------------------------------------------|-----------------------------------|---------------------------------------------------------------------|
| **COUNTS**                        |                      |      |                                               |                                   |                                                                     |
| alveolata>ciliophora              |                      | 12   |                                               |                                   |                                                                     |
| fungi>ascomycota                  |                      | 3    |                                               |                                   |                                                                     |
| fungi>basidiomycota               |                      | 2    |                                               |                                   |                                                                     |
| metazoa                           |                      | 1    |                                               |                                   |                                                                     |
| metazoa>Chordata                  |                      | 7    |                                               |                                   |                                                                     |
| metazoa>Cnidaria                  |                      | 5    |                                               |                                   |                                                                     |
| metazoa>echinodermata             |                      | 1    |                                               |                                   |                                                                     |
| metazoa>hexapoda                  |                      | 8    |                                               |                                   |                                                                     |
| metazoa>vertebrata                |                      | 12   |                                               |                                   |                                                                     |
| metazoa>vertebrata>actinopterygii |                      | 7    |                                               |                                   |                                                                     |
| mycetozoa>dictyosteliida          |                      | 2    |                                               |                                   |                                                                     |
| stramenopiles                     |                      | 1    |                                               |                                   |                                                                     |
| viridiplantae                     |                      | 6    |                                               |                                   |                                                                     |
| 124406526                         | GSPATT00008424001    | 4620 | Paramecium tetraurelia                        | alveolata>ciliophora              | unnamed protein product [Paramecium tetraurelia].                   |
| 124400960                         | GSPATT00035572001    | 2472 | Paramecium tetraurelia                        | alveolata>ciliophora              | unnamed protein product [Paramecium tetraurelia].                   |
| 89285001                          | THERM_01027520       | 512  | Tetrahymena thermophila SB210                 | alveolata>ciliophora              | Ubiquitin-conjugating enzyme family protein [Tetrahymena            |
| 89289979                          | THERM_00011330       | 464  | Tetrahymena thermophila SB210                 | alveolata>ciliophora              | Ubiquitin-conjugating enzyme family protein [Tetrahymena            |
| 89299207                          | THERM_00481290       | 2633 | Tetrahymena thermophila SB210                 | alveolata>ciliophora              | Ubiquitin-conjugating enzyme family protein [Tetrahymena            |
| 89303321                          | THERM_00149190       | 6304 | Tetrahymena thermophila SB210                 | alveolata>ciliophora              | ubiquitin-activating enzyme E1 family protein [Tetrahymena          |
| 124401200                         | GSPATT00035810001    | 5133 | Paramecium tetraurelia                        | alveolata>ciliophora              | unnamed protein product [Paramecium tetraurelia].                   |
| 124399658                         | GSPATT00034627001    | 2123 | Paramecium tetraurelia                        | alveolata>ciliophora              | unnamed protein product [Paramecium tetraurelia].                   |
| 89288400                          | THERM_00028560       | 3915 | Tetrahymena thermophila SB210                 | alveolata>ciliophora              | ubiquitin-activating enzyme E1 family protein [Tetrahymena          |
| 124409420                         | GSPATT00010919001    | 1850 | Paramecium tetraurelia                        | alveolata>ciliophora              | unnamed protein product [Paramecium tetraurelia].                   |
| 124398217                         | GSPATT0003569001     | 2396 | Paramecium tetraurelia                        | alveolata>ciliophora              | unnamed protein product [Paramecium tetraurelia].                   |
| 124412336                         | GSPATT00012991001    | 2601 | Paramecium tetraurelia                        | alveolata>ciliophora              | unnamed protein product [Paramecium tetraurelia].                   |
| 85118516                          | NCU02688.1           | 440  | Neurospora crassa OR74A                       | fungi>ascomycota                  | hypothetical protein [Neurospora crassa OR74A].                     |
| 70999189                          | AFUA_3G13060         | 1062 | Aspergillus fumigatus Af293                   | fungi>ascomycota                  | ubiquitin conjugating enzyme, putative [Aspergillus fumigatus       |
| 42544747                          | FG01207.1            | 431  | Gibberella zeae PH-1                          | fungi>ascomycota                  | hypothetical protein FG01207.1 [Gibberella zeae PH-1].              |
| 58261412                          | CNF05830             | 927  | Cryptococcus neoformans var. neoformans JEC21 | fungi>basidiomycota               | hypothetical protein [Cryptococcus neoformans var. neoformans       |
| 58268232                          | CNF01270             | 920  | Cryptococcus neoformans var. neoformans JEC21 | fungi>basidiomycota               | hypothetical protein [Cryptococcus neoformans var. neoformans       |
| 71981623                          | ubc-17               | 679  | Caenorhabditis elegans                        | metazoa                           | Ubiquitin conjugating enzyme family member (ubc-17) [Caenorhabditis |
| Bflo1000002074                    | Bflo1000002074       | 527  | Branchiostoma floridae                        | metazoa>Chordata                  | fgenes2 pg.scaffold_8000077                                         |
| ci0100131458                      | ci0100131458         | 1058 | Ciona intestinalis                            | metazoa>Chordata                  | ci0100131458                                                        |
| Bflo1000037265                    | Bflo1000037265       | 301  | Branchiostoma floridae                        | metazoa>Chordata                  | e gw.8.290.1                                                        |
| Bflo1000027761                    | Bflo1000027761       | 1307 | Branchiostoma floridae                        | metazoa>Chordata                  | estExt fgenes2 pg.C_760117                                          |
| Bflo1000048584                    | Bflo1000048584       | 307  | Branchiostoma floridae                        | metazoa>Chordata                  | estExt gwp.C_3740030                                                |
| Bflo1000011222                    | Bflo1000011222       | 981  | Branchiostoma floridae                        | metazoa>Chordata                  | fgenes2 pg.scaffold_138000092                                       |
| Bflo1000025135                    | Bflo1000025135       | 307  | Branchiostoma floridae                        | metazoa>Chordata                  | estExt fgenes2 pm.C_2360005                                         |
| Nvec1000007435                    | Nvec1000007435       | 158  | Nematostella vectensis                        | metazoa>Cnidaria                  | e gw.69.171.1                                                       |
| Nvec1000012274                    | Nvec1000012274       | 222  | Nematostella vectensis                        | metazoa>Cnidaria                  | e gw.2654.4.1                                                       |
| Nvec1000013121                    | Nvec1000013121       | 275  | Nematostella vectensis                        | metazoa>Cnidaria                  | estExt gwp.C_30788                                                  |
| Nvec1000015586                    | Nvec1000015586       | 1039 | Nematostella vectensis                        | metazoa>Cnidaria                  | fgenes1 pg.scaffold_10000074                                        |
| Nvec1000005680                    | Nvec1000005680       | 659  | Nematostella vectensis                        | metazoa>Cnidaria                  | e gw.18.24.1                                                        |
| 115964468                         | LOC580131            | 234  | Strongylocentrotus purpuratus                 | metazoa>echinodermata             | PREDICTED: hypothetical protein [Strongylocentrotus purpuratus].    |
| 91089323                          | LOC56712             | 4316 | Tribolium castaneum                           | metazoa>hexapoda                  | PREDICTED: similar to CG6303-PA [Tribolium castaneum].              |
| 91084477                          | LOC659924            | 1041 | Tribolium castaneum                           | metazoa>hexapoda                  | PREDICTED: similar to CG10254-PA, isoform A [Tribolium castaneum].  |
| 24649371                          | CG10254              | 1398 | Drosophila melanogaster                       | metazoa>hexapoda                  | CG10254-PB, isoform B [Drosophila melanogaster].                    |
| 110760609                         | LOC724799            | 1287 | Apis mellifera                                | metazoa>hexapoda                  | PREDICTED: similar to CG10254-PA, isoform A [Apis mellifera].       |
| 58383761                          | ENSANGG00000017845   | 1220 | Anopheles gambiae str. PEST                   | metazoa>hexapoda                  | ENSANGP00000020334 [Anopheles gambiae str. PEST].                   |
| 45550729                          | Bruce                | 4876 | Drosophila melanogaster                       | metazoa>hexapoda                  | Bruce CG6303-PA [Drosophila melanogaster].                          |
| 58382934                          | IAP6                 | 4760 | Anopheles gambiae str. PEST                   | metazoa>hexapoda                  | ENSANGP0000002826 [Anopheles gambiae str. PEST].                    |
| 110756922                         | LOC411115            | 4673 | Apis mellifera                                | metazoa>hexapoda                  | PREDICTED: similar to Bruce CG6303-PA [Apis mellifera].             |
| 61744456                          | BIRC6                | 4829 | Homo sapiens                                  | metazoa>vertebrata                | baculoviral IAP repeat-containing 6 [Homo sapiens].                 |
| 114666526                         | LOC455196            | 371  | Pan troglodytes                               | metazoa>vertebrata                | PREDICTED: similar to ubiquitin-conjugating enzyme E2Z [Pan         |
| 315455                            | Ube22                | 350  | Mus musculus                                  | metazoa>vertebrata                | ubiquitin-conjugating enzyme E2Z (putative) [Mus musculus].         |
| 10048468                          | Birc6                | 4845 | Mus musculus                                  | metazoa>vertebrata                | baculoviral IAP repeat-containing 6 [Mus musculus].                 |
| 109478992                         | Ube20 predicted      | 5017 | Rattus norvegicus                             | metazoa>vertebrata                | PREDICTED: similar to baculoviral IAP repeat-containing 6 [Rattus   |
| 50234896                          | Ube20                | 1288 | Mus musculus                                  | metazoa>vertebrata                | ubiquitin-conjugating enzyme E20 [Mus musculus].                    |
| 33636750                          | UBE20                | 1292 | Homo sapiens                                  | metazoa>vertebrata                | ubiquitin-conjugating enzyme E20 [Homo sapiens].                    |
| 12751495                          | UBE2Z                | 246  | Homo sapiens                                  | metazoa>vertebrata                | ubiquitin-conjugating enzyme E2Z (putative) [Homo sapiens].         |
| 109492276                         | Ube20 predicted      | 1312 | Rattus norvegicus                             | metazoa>vertebrata                | PREDICTED: similar to ubiquitin-conjugating enzyme E20 [Rattus      |
| 109489413                         | Ube20 predicted      | 1315 | Rattus norvegicus                             | metazoa>vertebrata                | PREDICTED: similar to ubiquitin-conjugating enzyme E20 [Rattus      |
| 83320076                          | Ube2z                | 246  | Rattus norvegicus                             | metazoa>vertebrata                | ubiquitin-conjugating enzyme E2Z (putative) [Rattus norvegicus].    |
| 114670605                         | UBE20                | 1392 | Pan troglodytes                               | metazoa>vertebrata                | PREDICTED: ubiquitin-conjugating enzyme E20 [Pan troglodytes].      |
| 47213169                          | GSTEN:00010000:G:001 | 2135 | Tetraodon nigroviridis                        | metazoa>vertebrata>actinopterygii | unnamed protein product [Tetraodon nigroviridis].                   |
| 68437089                          | LOC56895             | 354  | Danio rerio                                   | metazoa>vertebrata>actinopterygii | PREDICTED: similar to Baculoviral IAP repeat-containing protein 6   |
| 50539720                          | zgc:92419            | 248  | Danio rerio                                   | metazoa>vertebrata>actinopterygii | PREDICTED: similar to RIKEN cDNA B230113M03 [Danio rerio].          |
| 47213168                          | GSTEN:00009999:G:001 | 3047 | Tetraodon nigroviridis                        | metazoa>vertebrata>actinopterygii | hypothetical protein LOC436602 [Danio rerio].                       |
| 47214958                          | GSTEN:00032514:G:001 | 1309 | Tetraodon nigroviridis                        | metazoa>vertebrata>actinopterygii | unnamed protein product [Tetraodon nigroviridis].                   |
| 47217004                          | GSTEN:00020460:G:001 | 403  | Tetraodon nigroviridis                        | metazoa>vertebrata>actinopterygii | unnamed protein product [Tetraodon nigroviridis].                   |
| 28830048                          | -                    | 2208 | Dictyostelium discoideum                      | mycetozoa>dictyosteliida          | unnamed protein product [Tetraodon nigroviridis].                   |
| 60472388                          | DBDRAFT_0217536      | 910  | Dictyostelium discoideum AX4                  | mycetozoa>dictyosteliida          | similar to Homo sapiens (Human). Hypothetical protein FLJ13786 (EC  |
| Ptri1000008184                    | Ptri1000008184       | 415  | Phaeodactylum tricornutum                     | stramenopiles                     | hypothetical protein DBDRAFT_0217536 [Dictyostelium discoideum      |
| 15219165                          | UBC26                | 1163 | Arabidopsis thaliana                          | viridiplantae                     | estExt fgenes1 pg.C chr 190218                                      |
| Crei10000012890                   | Crei10000012890      | 222  | Chlamydomonas reinhardtii                     | viridiplantae                     | UBC26 (ubiquitin-conjugating enzyme 25); ubiquitin-protein ligase   |
| 30685832                          | PHO2/UBC24           | 907  | Arabidopsis thaliana                          | viridiplantae                     | estExt fgenes2 pg.C_110201                                          |
| 15227320                          | UBC23                | 1102 | Arabidopsis thaliana                          | viridiplantae                     | PHO2/UBC24 (PHOSPHATE 2); ubiquitin-protein ligase [Arabidopsis     |
| 15229481                          | UBC25                | 609  | Arabidopsis thaliana                          | viridiplantae                     | UBC23 (ubiquitin-conjugating enzyme 22); ubiquitin-protein ligase   |
|                                   |                      |      |                                               |                                   | UBC25 (ubiquitin-conjugating enzyme 23); small conjugating protein  |

## 5. UBE2W

|                                   |                    |     |                               |                      |                                                                     |
|-----------------------------------|--------------------|-----|-------------------------------|----------------------|---------------------------------------------------------------------|
| **COUNTS**                        |                    |     |                               |                      |                                                                     |
| heterolobosea                     |                    | 1   |                               |                      |                                                                     |
| alveolata                         |                    | 2   |                               |                      |                                                                     |
| alveolata>ciliophora              |                    | 5   |                               |                      |                                                                     |
| viridiplantae                     |                    | 5   |                               |                      |                                                                     |
| fungi>ascomycota                  |                    | 3   |                               |                      |                                                                     |
| fungi>basidiomycota               |                    | 1   |                               |                      |                                                                     |
| metazoa                           |                    | 1   |                               |                      |                                                                     |
| metazoa>Chordata                  |                    | 3   |                               |                      |                                                                     |
| metazoa>Cnidaria                  |                    | 1   |                               |                      |                                                                     |
| metazoa>echinodermata             |                    | 1   |                               |                      |                                                                     |
| metazoa>hexapoda                  |                    | 4   |                               |                      |                                                                     |
| metazoa>vertebrata                |                    | 7   |                               |                      |                                                                     |
| metazoa>vertebrata>actinopterygii |                    | 3   |                               |                      |                                                                     |
| mycetozoa>dictyosteliida          |                    | 1   |                               |                      |                                                                     |
| 23509349                          | PF14_0128          | 299 | Plasmodium falciparum 3D7     | alveolata            | ubiquitin conjugating enzyme, putative [Plasmodium falciparum 3D7]. |
| VIib#55.m04812                    | VIib#55.m04812     | 287 | Toxoplasma gondii             | alveolata            | ubiquitin-conjugating enzyme domain-containing protein              |
| 89300310                          | THERM_00285290     | 256 | Tetrahymena thermophila SB210 | alveolata>ciliophora | Ubiquitin-conjugating enzyme family protein [Tetrahymena            |
| 94364832                          | Ube2w              | 180 | Mus musculus                  | metazoa>vertebrata   | PREDICTED: similar to CG7220-PA, isoform A isoform 5 [Mus           |
| 50557414                          | YALIOF1955g        | 178 | Yarrowia lipolytica CLIB122   | fungi>ascomycota     | hypothetical protein [Yarrowia lipolytica].                         |
| 82795563                          | Ube2w              | 178 | Mus musculus                  | metazoa>vertebrata   | PREDICTED: similar to CG7220-PA, isoform A isoform 11 [Mus          |
| 114620512                         | UBE2W              | 162 | Pan troglodytes               | metazoa>vertebrata   | PREDICTED: ubiquitin-conjugating enzyme E2W (putative) isoform 1    |
| 47933381                          | UBE2W              | 162 | Homo sapiens                  | metazoa>vertebrata   | ubiquitin-conjugating enzyme E2W (putative) isoform 1 [Homo         |
| 18401461                          | ATUBC2-1           | 161 | Arabidopsis thaliana          | viridiplantae        | ATUBC2-1 (Arabidopsis thaliana ubiquitin-conjugating enzyme);       |
| 18410856                          | UBC16              | 161 | Arabidopsis thaliana          | viridiplantae        | UBC16 (ubiquitin-conjugating enzyme 15); ubiquitin-protein ligase   |
| 18419831                          | UBC17              | 161 | Arabidopsis thaliana          | viridiplantae        | UBC17 (UBIQUITIN-CONJUGATING ENZYME 17); ubiquitin-protein ligase   |
| 18422281                          | UBC18              | 161 | Arabidopsis thaliana          | viridiplantae        | UBC18 (ubiquitin-conjugating enzyme 16); ubiquitin-protein ligase   |
| Crei1000002793                    | Crei1000002793     | 161 | Chlamydomonas reinhardtii     | viridiplantae        | e gwW.24.158.1                                                      |
| 46124999                          | FG06877.1          | 157 | Gibberella zeae PH-1          | fungi>ascomycota     | hypothetical protein FG06877.1 [Gibberella zeae PH-1].              |
| 71002042                          | AFUA_2G13690       | 158 | Aspergillus fumigatus Af293   | fungi>ascomycota     | ubiquitin conjugating enzyme, putative [Aspergillus fumigatus       |
| 28573347                          | CG7220             | 154 | Drosophila melanogaster       | metazoa>hexapoda     | CG7220-PA, isoform A [Drosophila melanogaster].                     |
| 58387116                          | ENSANGG00000018586 | 154 | Anopheles gambiae str. PEST   | metazoa>hexapoda     | ENSANGP00000024002 [Anopheles gambiae str. PEST].                   |
| 66549055                          | LOC409100          | 154 | Apis mellifera                | metazoa>hexapoda     | PREDICTED: similar to CG7220-PA, isoform A [Apis mellifera].        |
| 91079008                          | LOC663661          | 154 | Tribolium castaneum           | metazoa>hexapoda     | PREDICTED: similar to CG7220-PA, isoform A [Tribolium castaneum].   |
| 124416285                         | GSPATT00016175001  | 152 | Paramecium tetraurelia        | alveolata>ciliophora | unnamed protein product [Paramecium tetraurelia].                   |



supplementary\_material\_E2\_gis.txt

|                |                      |     |                               |                                   |                                                                      |
|----------------|----------------------|-----|-------------------------------|-----------------------------------|----------------------------------------------------------------------|
| 17510293       | ubc-16               | 152 | Caenorhabditis elegans        | metazoa                           | Ubiquitin Conjugating enzyme family member (ubc-16) [Caenorhabditis] |
| 46099348       | UM03443.1            | 152 | Ustilago maydis 521           | fungi>basidiomycota               | hypothetical protein UM03443.1 [Ustilago maydis 521].                |
| Nvec1000014187 | Nvec1000014187       | 153 | Nematostella vectensis        | metazoa>Cnidaria                  | estExt_gwp.C_3490026                                                 |
| 114620514      | UBE2W                | 151 | Pan troglodytes               | metazoa>vertebrata                | PREDICTED: ubiquitin-conjugating enzyme E2W (putative) isoform 2     |
| 45387655       | flj110111            | 151 | Danio rerio                   | metazoa>vertebrata>actinopterygii | hypothetical protein LOC402907 [Danio rerio].                        |
| 4793385        | UBE2W                | 151 | Homo sapiens                  | metazoa>vertebrata                | ubiquitin-conjugating enzyme E2W (putative) isoform 2 [Homo]         |
| Bf1o1000025168 | Bf1o1000025168       | 152 | Branchiostoma floridae        | metazoa>Chordata                  | estExt_fgfnsh2.pm.C_2780002                                          |
| 124394210      | GSPATT00030369001    | 150 | Paramecium tetraurelia        | alveolata>ciliophora              | unnamed protein product [Paramecium tetraurelia].                    |
| 124397544      | GSPATT00032900001    | 150 | Paramecium tetraurelia        | alveolata>ciliophora              | unnamed protein product [Paramecium tetraurelia].                    |
| 115663109      | LOC582071            | 149 | Strongylocentrotus purpuratus | metazoa>echinodermata             | PREDICTED: similar to Ubiquitin-conjugating enzyme E2W (putative)    |
| 66827055       | DDBDRAFT_0202295     | 149 | Dictyostelium discoideum AX4  | mycetozoa>dictyosteliida          | hypothetical protein DDBDRAFT_0202295 [Dictyostelium discoideum]     |
| 124399351      | GSPATT00034321001    | 148 | Paramecium tetraurelia        | alveolata>ciliophora              | unnamed protein product [Paramecium tetraurelia].                    |
| Ngru1000001737 | Ngru1000001737       | 144 | Naegleria gruberi             | heterolobosea                     | fgfnshHS.pm.scaffold_72000004                                        |
| 47223533       | GSTEN:00015564:G:001 | 148 | Tetraodon nigroviridis        | metazoa>vertebrata>actinopterygii | unnamed protein product [Tetraodon nigroviridis].                    |
| ci0100140113   | ci0100140113         | 145 | Ciona intestinalis            | metazoa>Chordata                  | ci0100140113                                                         |
| Bf1o1000032579 | Bf1o1000032579       | 144 | Branchiostoma floridae        | metazoa>Chordata                  | estExt_fgfnsh2.pg.C_5140030                                          |
| 68356096       | LOC586071            | 126 | Danio rerio                   | metazoa>vertebrata>actinopterygii | PREDICTED: similar to CG7220-PB, isoform B [Danio rerio].            |
| 109475992      | LOC682704            | 396 | Rattus norvegicus             | metazoa>vertebrata                | PREDICTED: similar to CG7220-PA, isoform A [Rattus norvegicus].      |

## 6. Ufc1

\*\*COUNTS\*\*

|                                   |   |
|-----------------------------------|---|
| heterolobosea                     | 1 |
| alveolata                         | 3 |
| alveolata>ciliophora              | 3 |
| euglenozoa>kinetoplastida         | 3 |
| metazoa                           | 1 |
| metazoa>Choanoflagellida          | 1 |
| metazoa>Chordata                  | 3 |
| metazoa>Cnidaria                  | 2 |
| metazoa>echinodermata             | 2 |
| metazoa>hexapoda                  | 4 |
| metazoa>vertebrata                | 6 |
| metazoa>vertebrata>actinopterygii | 1 |
| mycetozoa>dictyosteliida          | 1 |
| stramenopiles                     | 1 |
| viridiplantae                     | 2 |

|                |                        |     |                                    |                                   |                                                                  |
|----------------|------------------------|-----|------------------------------------|-----------------------------------|------------------------------------------------------------------|
| 65305321       | TA20810                | 162 | Theileria annulata                 | alveolata                         | protein CGI-126, putative [Theileria annulata].                  |
| 71032621       | TP01_0425              | 172 | Theileria parva strain Muguga      | alveolata                         | hypothetical protein TP01_0425 [Theileria parva strain Muguga].  |
| V#31.m00087    | V#31.m00087            | 158 | Toxoplasma gondii                  | alveolata                         | hypothetical protein                                             |
| 124411671      | GSPATT00012387001      | 156 | Paramecium tetraurelia             | alveolata>ciliophora              | unnamed protein product [Paramecium tetraurelia].                |
| 124416518      | GSPATT00016381001      | 156 | Paramecium tetraurelia             | alveolata>ciliophora              | unnamed protein product [Paramecium tetraurelia].                |
| 89284506       | THERM_01108500         | 180 | Tetrahymena thermophila SB210      | alveolata>ciliophora              | hypothetical protein THERM_01108500 [Tetrahymena thermophila]    |
| 68125492       | LmjF15_1250            | 171 | Leishmania major                   | euglenozoa>kinetoplastida         | hypothetical protein, conserved [Leishmania major].              |
| 71650234       | Tc00_1047053506445.100 | 164 | Trypanosoma cruzi strain CL Brener | euglenozoa>kinetoplastida         | hypothetical protein [Trypanosoma cruzi strain CL Brener].       |
| 71744660       | Tb09_160_4150          | 165 | Trypanosoma brucei TREU927         | euglenozoa>kinetoplastida         | hypothetical protein Tb09_160_4150 [Trypanosoma brucei TREU927]. |
| Ngru1000001149 | Ngru1000001149         | 176 | Naegleria gruberi                  | heterolobosea                     | e.gw1.20.112.1                                                   |
| 17525292       | C40H1_6                | 162 | Caenorhabditis elegans             | metazoa                           | C40H1.6 [Caenorhabditis elegans].                                |
| Mbre1000002981 | Mbre1000002981         | 167 | Monosiga brevicollis               | metazoa>Choanoflagellida          | fgfnsh2.pm.scaffold_3000061                                      |
| ci0100146879   | ci0100146879           | 166 | Ciona intestinalis                 | metazoa>Chordata                  | ci0100146879                                                     |
| Bf1o1000011222 | Bf1o1000011222         | 981 | Branchiostoma floridae             | metazoa>Chordata                  | fgfnsh2.pg.scaffold_138000092                                    |
| Bf1o1000025213 | Bf1o1000025213         | 170 | Branchiostoma floridae             | metazoa>Chordata                  | estExt_fgfnsh2.pm.C_3610002                                      |
| Nvec1000018661 | Nvec1000018661         | 170 | Nematostella vectensis             | metazoa>Cnidaria                  | fgfnsh1.pg.scaffold_199000025                                    |
| Nvec1000012015 | Nvec1000012015         | 116 | Nematostella vectensis             | metazoa>Cnidaria                  | e.gw.1650.2.1                                                    |
| 72013071       | LOC582152              | 139 | Strongylocentrotus purpuratus      | metazoa>echinodermata             | PREDICTED: similar to conserved hypothetical protein             |
| 115937394      | LOC582152              | 170 | Strongylocentrotus purpuratus      | metazoa>echinodermata             | PREDICTED: similar to conserved hypothetical protein             |
| 58389907       | ENSANGP00000008034     | 164 | Anopheles gambiae str. PEST        | metazoa>hexapoda                  | ENSANGP00000010523 [Anopheles gambiae str. PEST].                |
| 66512255       | LOC581106              | 170 | Apis mellifera                     | metazoa>hexapoda                  | PREDICTED: similar to CG8386-PA [Apis mellifera].                |
| 19922352       | CG8386                 | 164 | Drosophila melanogaster            | metazoa>hexapoda                  | CG8386-PA [Drosophila melanogaster].                             |
| 91084695       | LOC657656              | 166 | Tribolium castaneum                | metazoa>hexapoda                  | PREDICTED: similar to Ufm1-conjugating enzyme 1 (Ubiquitin-fold  |
| 13384768       | Ufc1                   | 167 | Mus musculus                       | metazoa>vertebrata                | ubiquitin-fold modifier conjugating enzyme 1 [Mus musculus].     |
| 114560786      | LOC457449              | 122 | Pan troglodytes                    | metazoa>vertebrata                | PREDICTED: hypothetical protein isoform 1 [Pan troglodytes].     |
| 7705481        | UFC1                   | 167 | Homo sapiens                       | metazoa>vertebrata                | ubiquitin-fold modifier conjugating enzyme 1 [Homo sapiens].     |
| 55588606       | LOC457449              | 167 | Pan troglodytes                    | metazoa>vertebrata                | PREDICTED: hypothetical protein isoform 3 [Pan troglodytes].     |
| 114560788      | LOC457449              | 148 | Pan troglodytes                    | metazoa>vertebrata                | PREDICTED: hypothetical protein isoform 2 [Pan troglodytes].     |
| 51172600       | Ufc1                   | 167 | Rattus norvegicus                  | metazoa>vertebrata                | Ufm1-conjugating enzyme 1 [Rattus norvegicus].                   |
| 51011123       | zgc:100800             | 166 | Danio rerio                        | metazoa>vertebrata>actinopterygii | hypothetical protein LOC445256 [Danio rerio].                    |
| 90970505       | ufc1                   | 164 | Dictyostelium discoideum AX4       | mycetozoa>dictyosteliida          | ubiquitin-like (UBL) post-translational modifier [Dictyostelium  |
| Pram1000015146 | Pram1000015146         | 158 | Phytophthora ramorum               | stramenopiles                     | 53495                                                            |
| Crei1000013700 | Crei1000013700         | 167 | Chlamydomonas reinhardtii          | viridiplantae                     | estExt_fgfnsh2.pg.C_240032                                       |
| 18396376       | ATIG27530              | 174 | Arabidopsis thaliana               | viridiplantae                     | unknown protein [Arabidopsis thaliana].                          |

## 7. Ubc6p

\*\*COUNTS\*\*

|                                         |    |
|-----------------------------------------|----|
| diplomonadida group>diplomonadida group | 3  |
| parabasaliida                           | 2  |
| euglenozoa>kinetoplastida               | 8  |
| heterolobosea                           | 2  |
| alveolata                               | 4  |
| alveolata>ciliophora                    | 6  |
| stramenopiles                           | 11 |
| viridiplantae                           | 8  |
| entamoebidae                            | 3  |
| mycetozoa>dictyosteliida                | 3  |
| fungi>ascomycota                        | 14 |
| fungi>basidiomycota                     | 3  |
| metazoa                                 | 3  |
| metazoa>Choanoflagellida                | 3  |
| metazoa>Chordata                        | 4  |
| metazoa>Cnidaria                        | 3  |
| metazoa>echinodermata                   | 2  |
| metazoa>hexapoda                        | 6  |
| metazoa>vertebrata                      | 10 |
| metazoa>vertebrata>actinopterygii       | 5  |

|                 |                        |     |                                    |                                   |                                                                     |
|-----------------|------------------------|-----|------------------------------------|-----------------------------------|---------------------------------------------------------------------|
| 50554345        | YALI0E30173g           | 132 | Yarrowia lipolytica CLIB122        | fungi>ascomycota                  | hypothetical protein [Yarrowia lipolytica].                         |
| 50550481        | YALI0D11748g           | 252 | Yarrowia lipolytica CLIB122        | fungi>ascomycota                  | hypothetical protein [Yarrowia lipolytica].                         |
| 46101486        | UM05955.1              | 223 | Ustilago maydis 521                | fungi>basidiomycota               | hypothetical protein UM05955.1 [Ustilago maydis 521].               |
| 71423664        | Tc00_1047053504055.81  | 225 | Trypanosoma cruzi strain CL Brener | euglenozoa>kinetoplastida         | ubiquitin-conjugating enzyme E2 [Trypanosoma cruzi strain CL        |
| 71655980        | Tc00_1047053508387.100 | 437 | Trypanosoma cruzi strain CL Brener | euglenozoa>kinetoplastida         | ubiquitin-conjugating enzyme [Trypanosoma cruzi strain CL Brener].  |
| 71668166        | Tc00_1047053506435.300 | 225 | Trypanosoma cruzi strain CL Brener | euglenozoa>kinetoplastida         | ubiquitin-conjugating enzyme E2 [Trypanosoma cruzi strain CL        |
| 71665910        | Tc00_1047053506789.200 | 410 | Trypanosoma cruzi strain CL Brener | euglenozoa>kinetoplastida         | ubiquitin-conjugating enzyme [Trypanosoma cruzi strain CL Brener].  |
| 62359387        | Tb927_4_3190           | 220 | Trypanosoma brucei                 | euglenozoa>kinetoplastida         | ubiquitin-conjugating enzyme E2, putative [Trypanosoma brucei].     |
| 70802852        | -                      | 310 | Trypanosoma brucei                 | euglenozoa>kinetoplastida         | ubiquitin-conjugating enzyme, putative [Trypanosoma brucei].        |
| 121894423       | TVAG_091080            | 352 | Trichomonas vaginalis G3           | parabasaliida                     | Ubiquitin-conjugating enzyme family protein [Trichomonas vaginalis  |
| 121911847       | TVAG_066800            | 344 | Trichomonas vaginalis G3           | parabasaliida                     | Ubiquitin-conjugating enzyme family protein [Trichomonas vaginalis  |
| 91082969        | LOC662641              | 225 | Tribolium castaneum                | metazoa>hexapoda                  | PREDICTED: similar to ubiquitin conjugating enzyme E2, J2 isoform 2 |
| 91079666        | LOC655113              | 268 | Tribolium castaneum                | metazoa>hexapoda                  | PREDICTED: similar to ubiquitin-conjugating enzyme E2, J1           |
| Ib#25.m01819    | Ib#25.m01819           | 676 | Toxoplasma gondii                  | alveolata                         | hypothetical protein                                                |
| XII#65.m01972   | XII#65.m01972          | 202 | Toxoplasma gondii                  | alveolata                         | ubiquitin-conjugating enzyme E2, putative                           |
| XII#50.m03405   | XII#50.m03405          | 207 | Toxoplasma gondii                  | alveolata                         | ubiquitin-conjugating enzyme E2, putative                           |
| Tpseu1000010010 | Tpseu1000010010        | 175 | Thalassiosira pseudonana           | stramenopiles                     | 160728                                                              |
| Tpseu1000002627 | Tpseu1000002627        | 318 | Thalassiosira pseudonana           | stramenopiles                     | 109475                                                              |
| Tpseu1000004117 | Tpseu1000004117        | 183 | Thalassiosira pseudonana           | stramenopiles                     | 119221                                                              |
| 47212316        | GSTEN:00003577:G:001   | 185 | Tetraodon nigroviridis             | metazoa>vertebrata>actinopterygii | unnamed protein product [Tetraodon nigroviridis].                   |
| 47190747        | GSTEN:00037077:G:001   | 81  | Tetraodon nigroviridis             | metazoa>vertebrata>actinopterygii | unnamed protein product [Tetraodon nigroviridis].                   |
| 89287327        | THERM_00470910         | 443 | Tetrahymena thermophila SB210      | alveolata>ciliophora              | Ubiquitin-conjugating enzyme family protein [Tetrahymena            |
| 89303616        | THERM_00931940         | 221 | Tetrahymena thermophila SB210      | alveolata>ciliophora              | Ubiquitin-conjugating enzyme family protein [Tetrahymena            |
| 115969448       | LOC9010                | 249 | Strongylocentrotus purpuratus      | metazoa>echinodermata             | PREDICTED: similar to LOC495424 protein [Strongylocentrotus         |
| 72159165        | LOC587822              | 370 | Strongylocentrotus purpuratus      | metazoa>echinodermata             | PREDICTED: similar to ubiquitin-conjugating enzyme E2, J1 (UBCG     |
| 19114168        | SPAC10F6.05c           | 227 | Schizosaccharomyces pombe 972h-    | fungi>ascomycota                  | hypothetical protein SPAC10F6.05c [Schizosaccharomyces pombe        |
| 6320947         | UBC6                   | 250 | Saccharomyces cerevisiae           | fungi>ascomycota                  | Ubc6p [Saccharomyces cerevisiae].                                   |
| 56090425        | MGC94113               | 259 | Rattus norvegicus                  | metazoa>vertebrata                | similar to Ubc6p homolog [Rattus norvegicus].                       |
| 109474783       | Ube2j1 predicted       | 386 | Rattus norvegicus                  | metazoa>vertebrata                | PREDICTED: similar to ubiquitin-conjugating enzyme E2, J1 [Rattus   |
| 109476293       | Ube2j1 predicted       | 426 | Rattus norvegicus                  | metazoa>vertebrata                | PREDICTED: similar to ubiquitin-conjugating enzyme E2, J1 [Rattus   |
| Psoj1000015568  | Psoj1000015568         | 249 | Phytophthora sojae                 | stramenopiles                     | 143578                                                              |
| Psoj1000000332  | Psoj1000000332         | 214 | Phytophthora sojae                 | stramenopiles                     | 108600                                                              |
| Pram1000004878  | Pram1000004878         | 332 | Phytophthora ramorum               | stramenopiles                     | 79160                                                               |
| Pram1000009034  | Pram1000009034         | 185 | Phytophthora ramorum               | stramenopiles                     | 74102                                                               |
| Pram1000009035  | Pram1000009035         | 225 | Phytophthora ramorum               | stramenopiles                     | 74101                                                               |



supplementary\_material\_E2\_gis.txt

|                |                |     |                        |                                   |                                                                     |
|----------------|----------------|-----|------------------------|-----------------------------------|---------------------------------------------------------------------|
| 68392303       | LOC557472      | 279 | Danio rerio            | metazoa>vertebrata>actinopterygii | PREDICTED: similar to CG4502-PA, isoform A [Danio rerio].           |
| 114598936      | LOC750981      | 291 | Pan troglodytes        | metazoa>vertebrata                | PREDICTED: hypothetical protein [Pan troglodytes].                  |
| 114658247      | UBE2Q2         | 375 | Pan troglodytes        | metazoa>vertebrata                | PREDICTED: ubiquitin-conjugating enzyme E2Q (putative) 2 isoform 4  |
| 114658255      | UBE2Q2         | 357 | Pan troglodytes        | metazoa>vertebrata                | PREDICTED: similar to Ubiquitin-conjugating enzyme E2Q (putative) 2 |
| 114658251      | UBE2Q2         | 353 | Pan troglodytes        | metazoa>vertebrata                | PREDICTED: ubiquitin-conjugating enzyme E2Q (putative) 2 isoform 1  |
| 114658249      | UBE2Q2         | 340 | Pan troglodytes        | metazoa>vertebrata                | PREDICTED: hypothetical protein isoform 5 [Pan troglodytes].        |
| 114559985      | UBE2Q1         | 422 | Pan troglodytes        | metazoa>vertebrata                | PREDICTED: ubiquitin-conjugating enzyme E2Q [Pan troglodytes].      |
| 71984336       | ubc-25         | 387 | Caenorhabditis elegans | metazoa                           | Ubiquitin Conjugating enzyme family member (ubc-25) [Caenorhabditis |
| Ngru1000014952 | Ngru1000014952 | 330 | Naegleria gruberi      | heterolobosea                     | estExt fgenshNG_pg.C 610113                                         |
| Ngru1000013764 | Ngru1000013764 | 772 | Naegleria gruberi      | heterolobosea                     | estExt_fgenshNG_pg.C_160052                                         |

## 9. AKTIP

## \*\*COUNTS\*\*

|                                   |   |
|-----------------------------------|---|
| parabasalidea                     | 1 |
| alveolata                         | 2 |
| alveolata>ciliophora              | 1 |
| stramenopiles                     | 3 |
| fungi>basidiomycota               | 2 |
| mycetozoa>dictyosteliida          | 1 |
| metazoa                           | 1 |
| metazoa>Choanoflagellida          | 1 |
| metazoa>Chordata                  | 1 |
| metazoa>Cnidaria                  | 3 |
| metazoa>echinodermata             | 1 |
| metazoa>hexapoda                  | 5 |
| metazoa>vertebrata                | 7 |
| metazoa>vertebrata>actinopterygii | 2 |

|                 |                      |     |                                               |                                   |                                                                     |
|-----------------|----------------------|-----|-----------------------------------------------|-----------------------------------|---------------------------------------------------------------------|
| 121917901       | TVAG 476010          | 182 | Trichomonas vaginalis G3                      | parabasalidea                     | Ubiquitin-conjugating enzyme family protein [Trichomonas vaginalis  |
| 23509112        | PFL2100w             | 465 | Plasmodium falciparum 3D7                     | alveolata                         | hypothetical protein PFL2100w [Plasmodium falciparum 3D7].          |
| Mbre1000000752  | Mbre1000000752       | 386 | Monosiga brevicollis                          | metazoa>Choanoflagellida          | fgenshl pg.scaffold 7000053                                         |
| 114662500       | FTS                  | 332 | Pan troglodytes                               | metazoa>vertebrata                | PREDICTED: fused toes homolog isoform 5 [Pan troglodytes].          |
| VIb#55.m05100   | VIb#55.m05100        | 303 | Toxoplasma gondii                             | alveolata                         | ubiquitin-conjugating enzyme domain-containing protein              |
| Nvec1000022094  | Nvec1000022094       | 298 | Nematostella vectensis                        | metazoa>Cnidaria                  | fgsh est.C_scaffold 25000015                                        |
| 114662502       | FTS                  | 293 | Pan troglodytes                               | metazoa>vertebrata                | PREDICTED: fused toes homolog isoform 1 [Pan troglodytes].          |
| 17566194        | ubc-19               | 292 | Caenorhabditis elegans                        | metazoa                           | Ubiquitin Conjugating enzyme family member (ubc-19) [Caenorhabditis |
| 58865430        | Fts                  | 292 | Rattus norvegicus                             | metazoa>vertebrata                | AKT interacting protein [Rattus norvegicus].                        |
| 61743933        | AKTIP                | 292 | Homo sapiens                                  | metazoa>vertebrata                | AKT interacting protein [Homo sapiens].                             |
| 6753918         | Aktip                | 292 | Mus musculus                                  | metazoa>vertebrata                | AKT interacting protein [Mus musculus].                             |
| 47216620        | GSTEN:00025428:G:001 | 290 | Tetraodon nigroviridis                        | metazoa>vertebrata>actinopterygii | unnamed protein product [Tetraodon nigroviridis].                   |
| 114600887       | LOC736031            | 281 | Pan troglodytes                               | metazoa>vertebrata                | PREDICTED: similar to fused toes homolog [Pan troglodytes].         |
| Pram10000008760 | Pram10000008760      | 281 | Phytophthora ramorum                          | stramenopiles                     | 74424                                                               |
| 115929982       | LOC578956            | 277 | Strongylocentrotus purpuratus                 | metazoa>echinodermata             | PREDICTED: hypothetical protein [Strongylocentrotus purpuratus].    |
| Nvec1000020327  | Nvec1000020327       | 273 | Nematostella vectensis                        | metazoa>Cnidaria                  | fgenshl pg.scaffold 156500002                                       |
| Nvec1000015413  | Nvec1000015413       | 272 | Nematostella vectensis                        | metazoa>Cnidaria                  | fgenshl pg.scaffold 6000043                                         |
| 91084089        | LOC656942            | 267 | Tribolium castaneum                           | metazoa>hexapoda                  | PREDICTED: similar to fused toes (predicted) [Tribolium             |
| 24656026        | CG16894              | 266 | Drosophila melanogaster                       | metazoa>hexapoda                  | CG16894-PA [Drosophila melanogaster].                               |
| 66510005        | LOC552831            | 266 | Apis mellifera                                | metazoa>hexapoda                  | PREDICTED: similar to fused toes [Apis mellifera].                  |
| Bflo1000043060  | Bflo1000043060       | 264 | Branchiostoma floridae                        | metazoa>Chordata                  | e gw.431.37.1                                                       |
| 41056191        | aktip                | 261 | Danio rerio                                   | metazoa>vertebrata>actinopterygii | akt interacting protein [Danio rerio].                              |
| Ptri1000004528  | Ptri1000004528       | 250 | Phaeodactylum tricorntum                      | stramenopiles                     | fgenshl pg.C chr 3000244                                            |
| 17933724        | cbx                  | 244 | Drosophila melanogaster                       | metazoa>hexapoda                  | crossbronx CG10536-PB, isoform B [Drosophila melanogaster].         |
| 58258487        | CNA02640             | 242 | Cryptococcus neoformans var. neoformans JEC21 | fungi>basidiomycota               | hypothetical protein [Cryptococcus neoformans var. neoformans       |
| 71003864        | UM00451.1            | 240 | Ustilago maydis 521                           | fungi>basidiomycota               | hypothetical protein UM00451.1 [Ustilago maydis 521].               |
| 124429462       | GSPATT00026577001    | 239 | Paramecium tetraurelia                        | alveolata>ciliophora              | unnamed protein product [Paramecium tetraurelia].                   |
| 114662514       | FTS                  | 237 | Pan troglodytes                               | metazoa>vertebrata                | PREDICTED: hypothetical protein isoform 6 [Pan troglodytes].        |
| 68816191        | DDBDRAFT_0204404     | 232 | Dictyostelium discoideum AX4                  | mycetozoa>dictyosteliida          | hypothetical protein DDBDRAFT_0204404 [Dictyostelium discoideum     |
| 58381786        | ENSANGS00000011255   | 203 | Anopheles gambiae str. PEST                   | metazoa>hexapoda                  | ENSANGS00000011255 [Anopheles gambiae str. PEST].                   |
| Tpseu1000010538 | Tpseu1000010538      | 161 | Thalassiosira pseudonana                      | stramenopiles                     | 165255                                                              |

III. Phyletic distribution of E2 domains across eukaryotes with completely sequenced genomes

| Lineage        | **Asco | Afum | Cgla | Dhan | Gzea | Klac | Ncra | Scer | Spom | Ylip | **Basid | Cneo | Umay | **Micro | Ecun | **Met | Agam | Amel | Bflo | Cele | Cint | Drer | Dmel | Hsap | Mmus | Ptro | Rnor | Spur | Tnig | Tcas | Mbre | Nvec | **E&D | Ehis | Ddis | **Plants | Crei | Otau | Atha | **stram | Ptri | Psoj | Pram | TPse | **Alv | Tthe | Ptet | Tgon | Tpar | Tann | Cpar | Pfal | **Kinet | Tcru | Tbru | Lmaj | Ngru | Glam | Tvag | **Misc | Gthe |
|----------------|--------|------|------|------|------|------|------|------|------|------|---------|------|------|---------|------|-------|------|------|------|------|------|------|------|------|------|------|------|------|------|------|------|------|-------|------|------|----------|------|------|------|---------|------|------|------|------|-------|------|------|------|------|------|------|------|---------|------|------|------|------|------|------|--------|------|
| all E2 domains |        | 20   | 12   | 13   | 17   | 12   | 16   | 14   | 14   | 14   |         | 19   | 16   |         | 8    |       | 27   | 25   | 52   | 26   | 32   | 46   | 33   | 54   | 70   | 69   | 55   | 32   | 47   | 27   | 26   | 39   |       | 17   | 29   |          | 22   | 13   | 53   |         | 18   | 19   | 19   | 19   |       | 40   | 71   | 17   | 11   | 12   | 8    | 14   |         | 23   | 13   | 15   | 33   | 11   | 42   |        | 3    |

- Abbreviations:
- \*\*Asco: Ascomycetes
  - Afum: Aspergillus fumigatus
  - Cgla: Candida glabrata
  - Dhan: Debaryomyces hansenii
  - Gzea: Gibberella zeae
  - Klac: Kluyveromyces lactis
  - Ncra: Neurospora crassa
  - Scer: Saccharomyces cerevisiae
  - Spom: Schizosaccharomyces pombe
  - Ylip: Yarrowia lipolytica
  - \*\*Basid: Basidiomycetes
  - Cneo: Cryptococcus neoformans
  - Umay: Ustilago maydis
  - \*\*Micro: Microsporidia
  - Ecun: Encephalitozoon cuniculi
  - \*\*Met: Metazoa
  - Agam: Anopheles gambiae
  - Amel: Apis mellifera
  - Bflo: Branchiostoma floridae
  - Cele: Caenorhabditis elegans
  - Cint: Ciona intestinalis
  - Drer: Danio rerio
  - Dmel: Drosophila melanogaster
  - Hsap: Homo sapiens
  - Mmus: Mus musculus
  - Ptro: Pan troglodytes
  - Rnor: Rattus norvegicus
  - Spur: Strongylocentrotus purpuratus
  - Tnig: Tetraodon nigroviridis
  - Tcas: Tribolium castaneum
  - Mbre: Monosiga brevicollis
  - Nvec: Nematostella vectensis
  - \*\*E&D: Amoebozoans
  - Ehis: Entamoeba histolytica
  - Ddis: Dictyostelium discoideum
- \*\*Plants:
- Crei: Chlamydomonas reinhardtii
  - Otau: Ostreococcus tauri
  - Atha: Arabidopsis thaliana
  - \*\*stram: Stramenopiles
  - Ptri: Phaeodactylum tricornutum
  - Psoj: Phytophthora sojae
  - Pram: Phytophthora ramorum
  - TPse: Thalassiosira pseudonana
  - \*\*Alv: Alveolates
  - Tthe: Tetrahymena thermophila
  - Ptet: Paramecium tetraurelia
  - Tgon: Toxoplasma gondii
  - Tpar: Theileria parva
  - Tann: Theileria annulata
  - Cpar: Cryptosporidium parvum
  - Pfal: Plasmodium falciparum
  - \*\*Kinet: Kinetoplastids and Heterolobosea
  - Tcru: Trypanosoma cruzi
  - Tbru: Trypanosoma brucei
  - Lmaj: Leishmania major
  - Ngru: Naegleria gruberi
  - Glam: Giardia lamblia
  - Tvag: Trichomonas vaginalis
  - \*\*Misc:
  - Gthe: Guillardia theta

IV. Comparison of E2 flap architectures with and without Ub/Ubl. (Adapted from pdbid: 1u9a and 1z5s)

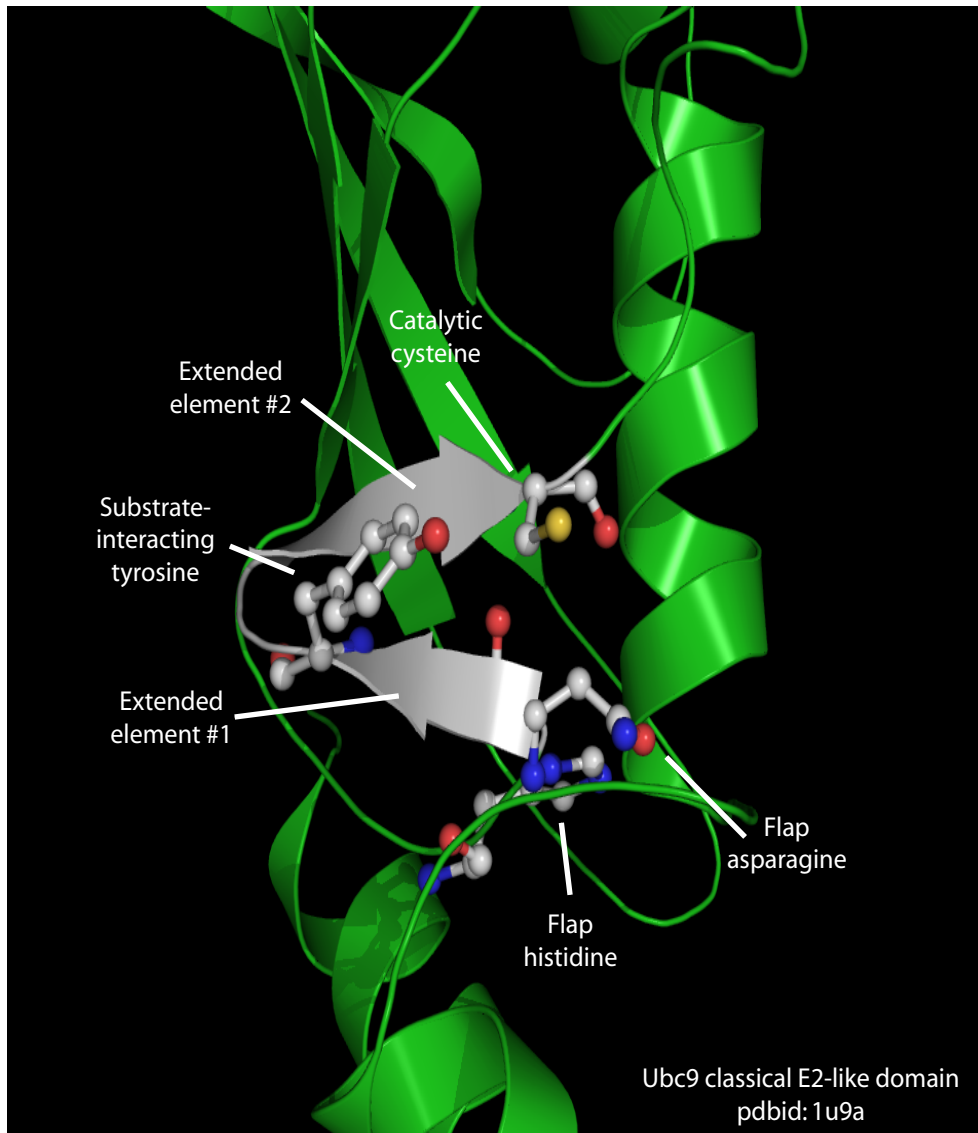

Ub/Ubl tail not present

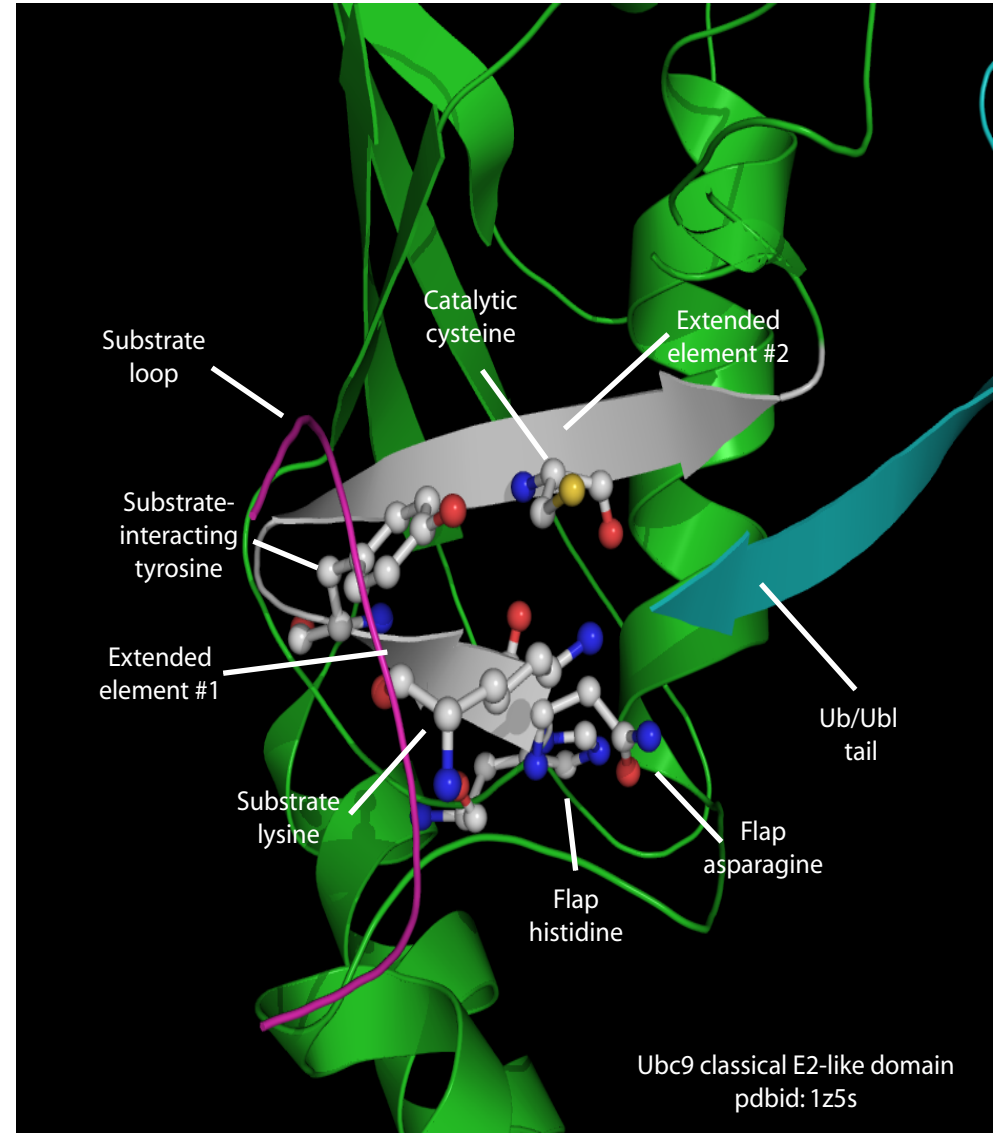

Ub/Ubl tail present
